# Supplementary material
Source: publisher figshare collection journal article supplement (https://frontiersin.figshare.com/ndownloader/files/24170888)
Supplement: Supplementary file [file 24170888]

# Supplement 9

## Movie

### **S9 Movie: SR101 Excretion Defect in *slc20a1a* MO zfl G III**

SR101 excretion assay as described before (Figure 3). Movie shows severe dilatation of distal part of gastrointestinal tract due to bag log caused by opening defects of the cloaca for the hindgut in *slc20a1a* MO G III zfl at five days post fertilization. Gut peristalsis is not reduced but clearly observable in all MO KD zfl, as seen in this movie. Scale bar: 100  $\mu$ m
